# Supplementary material for: Synthesis, Pharmacological Evaluation, and Molecular Modeling of Lappaconitine–1,5-Benzodiazepine Hybrids
Source: MDPI journal article supplement (doi:10.3390/molecules28104234), 2023-05-22
Supplement: s1 [file s1]

## Synthesis, pharmacological evaluation, and molecular modeling of lappaconitine–1,5-benzodiazepine hybrids

Kirill P. Cheremnykh <sup>1</sup>, Arkadiy O. Bryzgalov <sup>1</sup>, Dmitry S. Baev <sup>1</sup>, Sergey A. Borisov <sup>1</sup>, Yulia S. Sotnikova <sup>1</sup>, Victor A. Savelyev <sup>1</sup>, Tatyana G. Tolstikova <sup>1</sup>, Shamansur S. Sagdullaev <sup>2</sup> and Elvira E. Shults <sup>1,\*</sup>

<sup>1</sup> N.N. Vorozhtsov Novosibirsk Institute of Organic Chemistry, Siberian Branch, Russian Academy of Sciences, Lavrentjev Avenue 9, 630090 Novosibirsk, Russian Federation; schultz@nioch.nsc.ru

<sup>2</sup> S.Yu. Yunusov Institute of the Chemistry of Plant Substances, Academy of Sciences of the Republic of Uzbekistan, Mirzo Ulugbek str. 77, 100170 Tashkent, Uzbekistan; plant\_inst@icps.org.uz

\* Correspondence: schultz@nioch.nsc.ru; Tel.: +7-383-3308533

### Table of Contents

|                                                                                                                                                                  |         |
|------------------------------------------------------------------------------------------------------------------------------------------------------------------|---------|
| 1. NMR Spectra of new compounds <b>3,7-12</b> .....                                                                                                              | S1- S7. |
| 2. Effect of compound <b>8</b> or <b>10</b> injection (dose 5mg/kg) on ECG parameters .....                                                                      | S8,9    |
| 3. Changes in the rat ECG during administration of compound <b>8</b> on a model of calcium chloride arrhythmia.....                                              | S 10    |
| 4. Arrhythmia in rats caused by the introduction of epinephrine and restoration of the rhythm against the background of the administered compound <b>8</b> ..... | S 11    |
| 5. Rat atrium beat alteration after arrhythmogen administration.....                                                                                             | S 12    |
| 6. Rat atrium beat alteration after administration of arrhythmogen against the background of compounds <b>8</b> or <b>10</b> .....                               | S13     |
| 7. Table S1-S3. Influence of compounds <b>8</b> and <b>10</b> on ECG parameters.....                                                                             | P 15    |
| 8. Fig S14. Diagrams of interactions of flecainide <b>16</b> and quinidine <b>17</b> .....                                                                       | P. 16   |
| 9. Fig S15. Superposition of sodium channel blockers.....                                                                                                        | P. 17   |
| 9. Fig S16. HPLC-UV spectrum for compounds <b>8</b> .....                                                                                                        | P. 18   |

Figure S 1.1.  $^1\text{H}$  NMR spectrum for compound **3** ( $\text{CDCl}_3$ , 400 MHz)

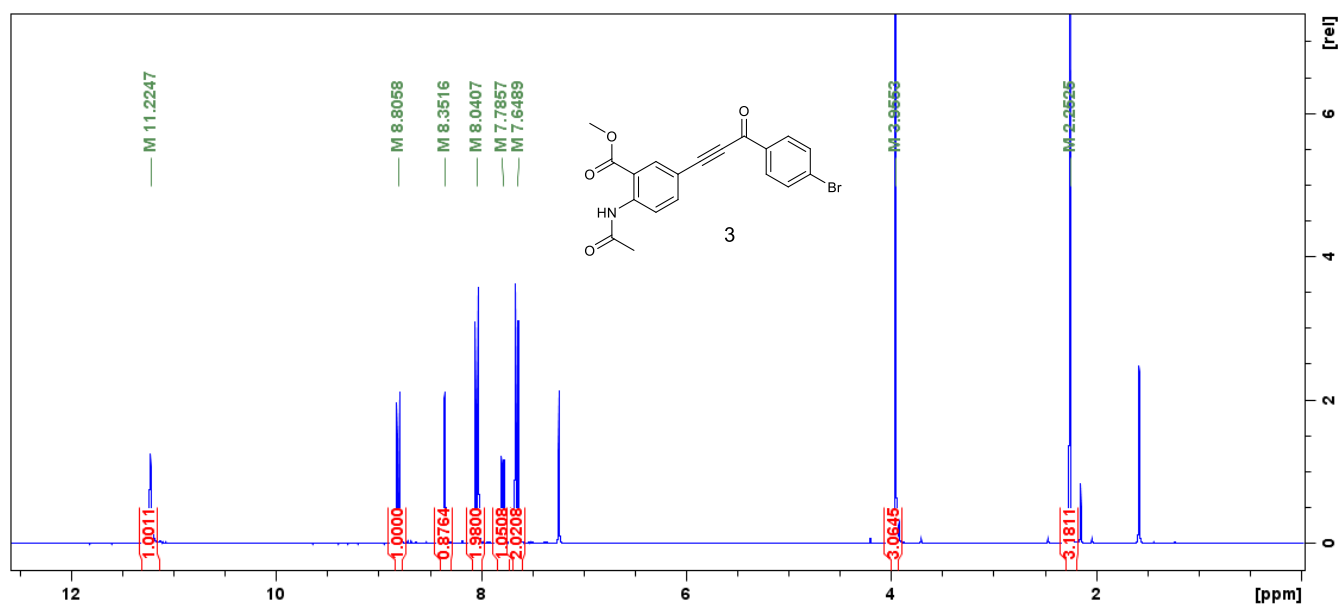

Figure S 1.2.  $^{13}\text{C}$  NMR spectrum for compound **3** ( $\text{CDCl}_3$ , 125 MHz)

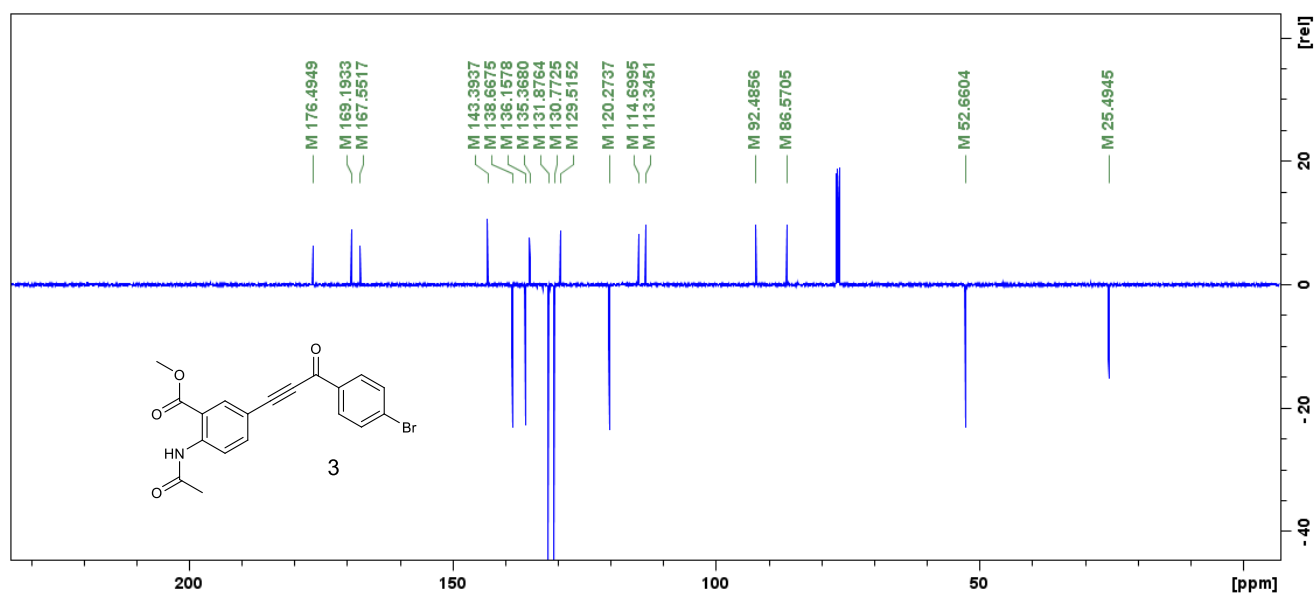

Figure S 2.1.  $^1\text{H}$  NMR spectrum for compound **7** ( $\text{CDCl}_3$ , 500 MHz)

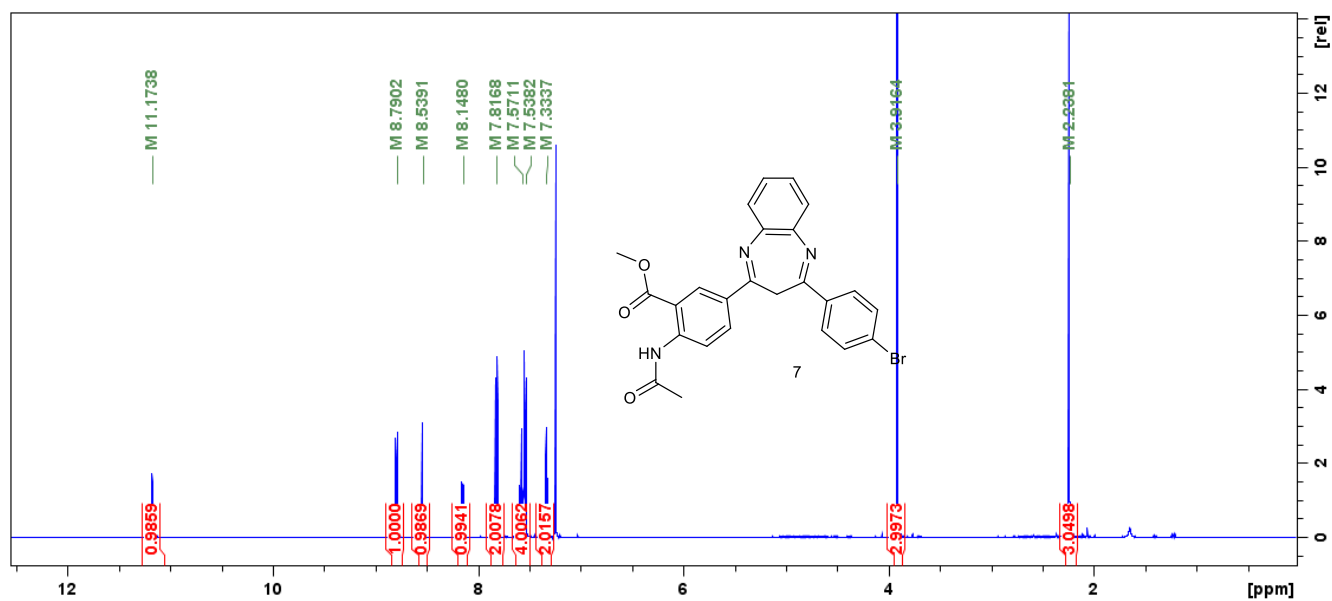

Figure S 2.2. Temperature dependent  $^1\text{H}$  NMR spectrum for compound **7** recorded in  $(\text{CD}_3)_2\text{SO}$ , 400 MHz

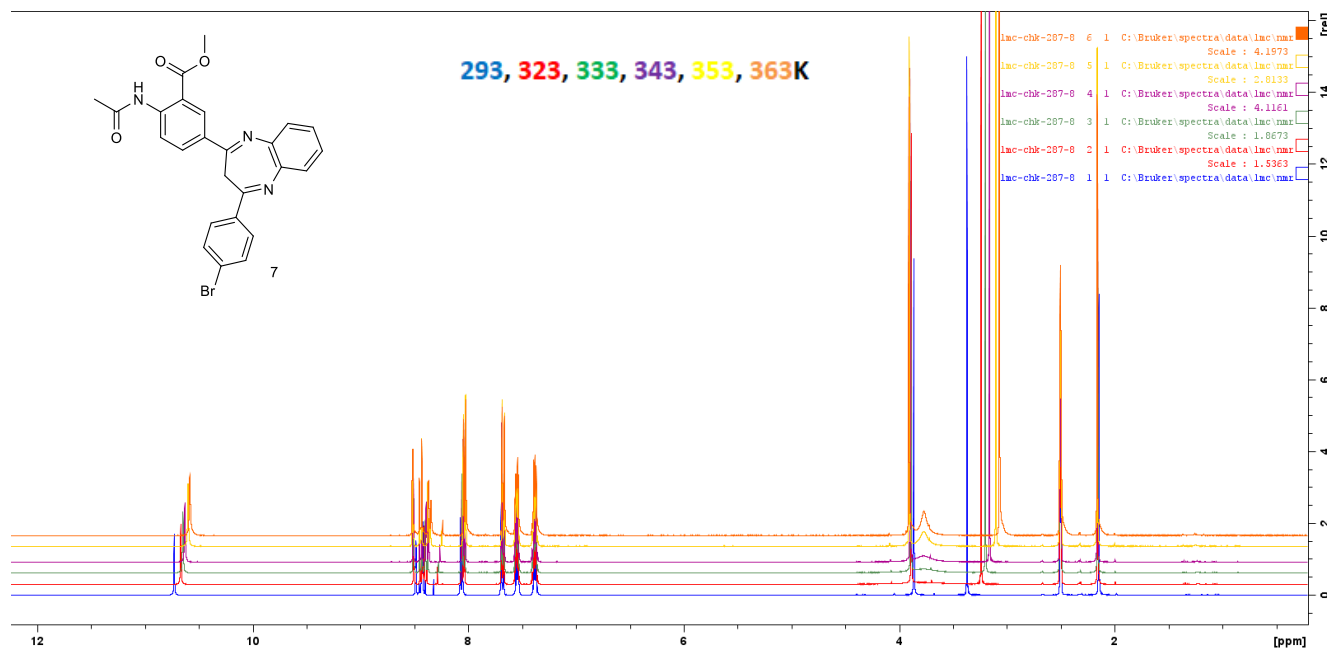

Figure S 2.3. Selected signals from spectra S2.2

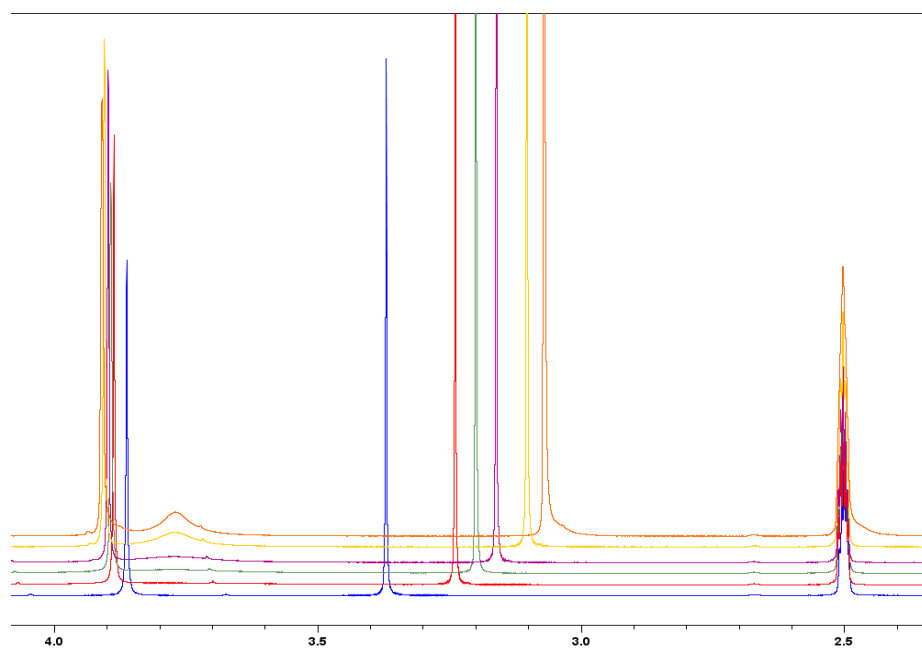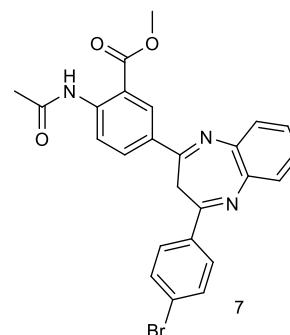

Figure S2.4.  $^{13}\text{C}$  NMR spectrum for compound **7** ( $\text{CDCl}_3$ , 125 MHz)

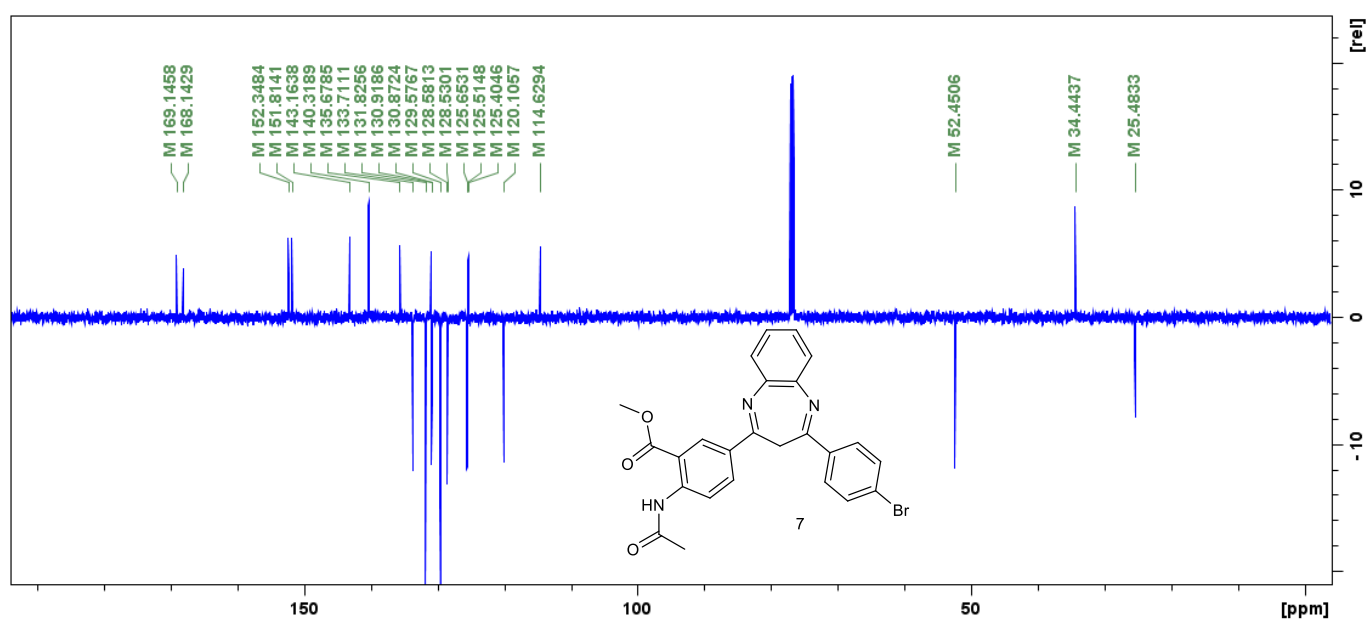

Figure S 3.1.  $^1\text{H}$  NMR spectrum for compound **8** ( $\text{CDCl}_3$ , 500 MHz)

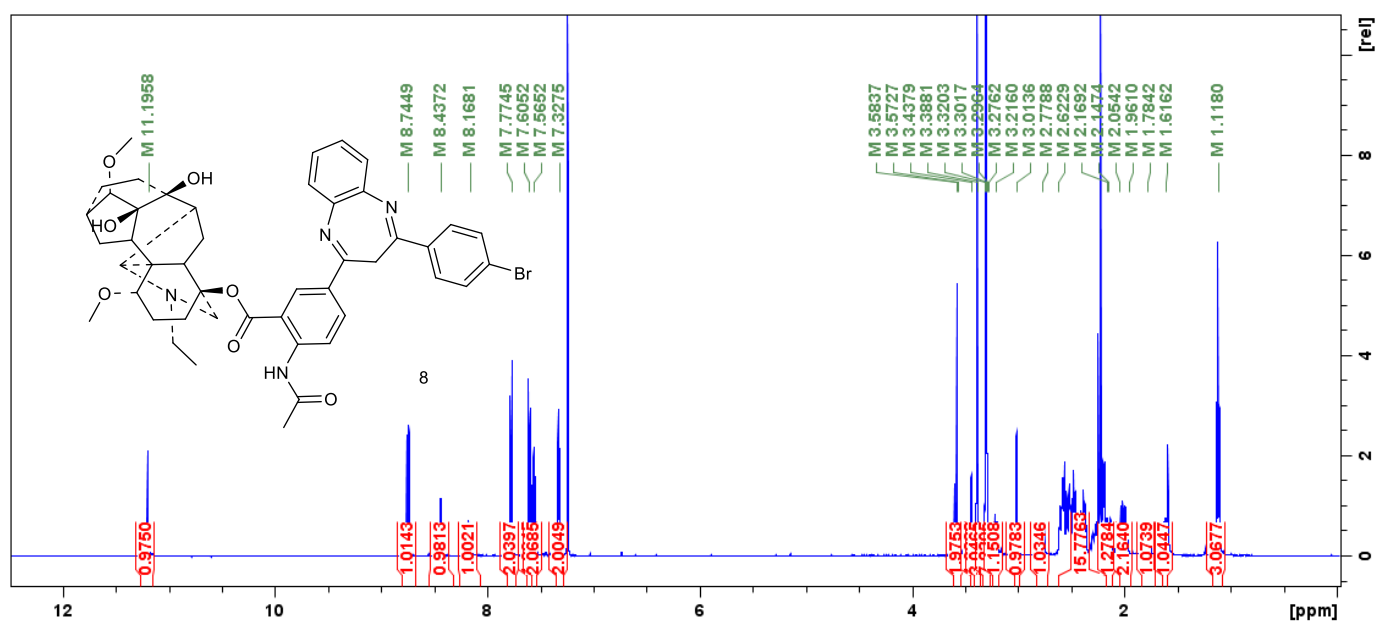

S 3.2. Temperature dependent  $^1\text{H}$  NMR spectrum for compound **8** recorded in  $(\text{CD}_3)_2\text{SO}$ , 400 MHz)

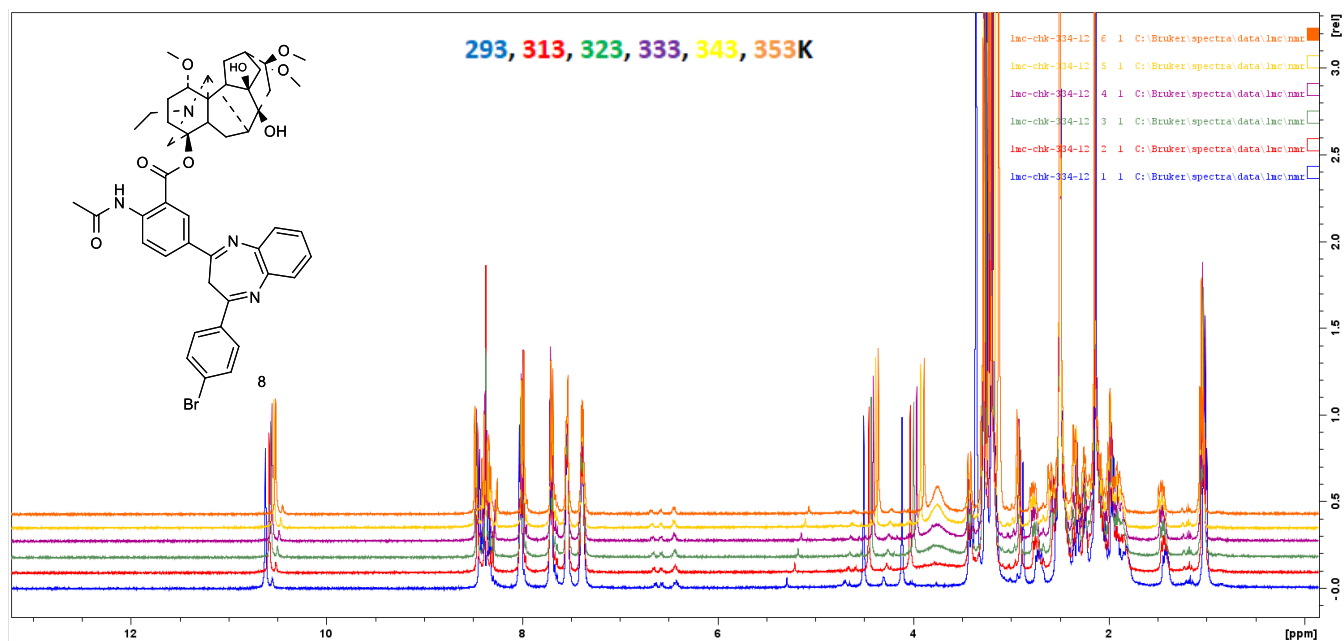

293, 313, 323, 333, 343, 353K

The figure displays a series of <sup>1</sup>H NMR spectra for compound 8, recorded at temperatures of 293, 313, 323, 333, 343, and 353 K. The x-axis represents the chemical shift in ppm, ranging from approximately 1.0 to 5.0. The y-axis represents the relative intensity, ranging from 0.0 to 1.0. The spectra show several distinct peaks, including a broad peak around 4.5 ppm, a sharp peak around 4.1 ppm, and a complex multiplet between 2.5 and 3.5 ppm. The chemical structure of compound 8 is shown below the spectra, featuring a complex polycyclic core with a bromophenyl group and a carbonyl group.

CC(=O)Nc1ccc(cc1C(=O)O[C@H]2[C@@H]3[C@H]4[C@H]2[C@@H](OC)[C@H](OC)[C@H]4O)[C@H]3c5ccccc5C6=CC=CC=C6

8

13C NMR spectrum of compound 10. The x-axis represents chemical shift in ppm, ranging from 0 to 180. The y-axis represents relative intensity in arbitrary units, ranging from -4 to 4. The spectrum shows several sharp peaks, with the most intense ones clustered between 40 and 60 ppm. Numerous peaks are labeled with their corresponding chemical shift values in ppm.

| Chemical Shift (ppm) |
|----------------------|
| 169.0428             |
| 166.7830             |
| 152.4812             |
| 151.2751             |
| 143.4156             |
| 140.2987             |
| 140.2544             |
| 135.9589             |
| 133.9216             |
| 131.9690             |
| 130.4531             |
| 130.4206             |
| 129.4239             |
| 128.6404             |
| 128.5199             |
| 125.5716             |
| 125.3441             |
| 125.2570             |
| 120.2233             |
| 115.4101             |
| 89.9678              |
| 85.2602              |
| 83.9482              |
| 82.6892              |
| 78.4039              |
| 75.3949              |
| 61.2995              |
| 57.7914              |
| 56.4624              |
| 55.9533              |
| 55.3386              |
| 50.8613              |
| 49.5711              |
| 48.8249              |
| 48.3050              |
| 47.4336              |
| 44.7349              |
| 36.0998              |
| 33.9261              |
| 31.6643              |
| 26.6172              |
| 26.0457              |
| 25.4920              |
| 24.0811              |
| 13.4072              |

Figure S 4.1.  $^1\text{H}$  NMR spectrum for compound **9** ( $\text{CDCl}_3$ , 500 MHz)

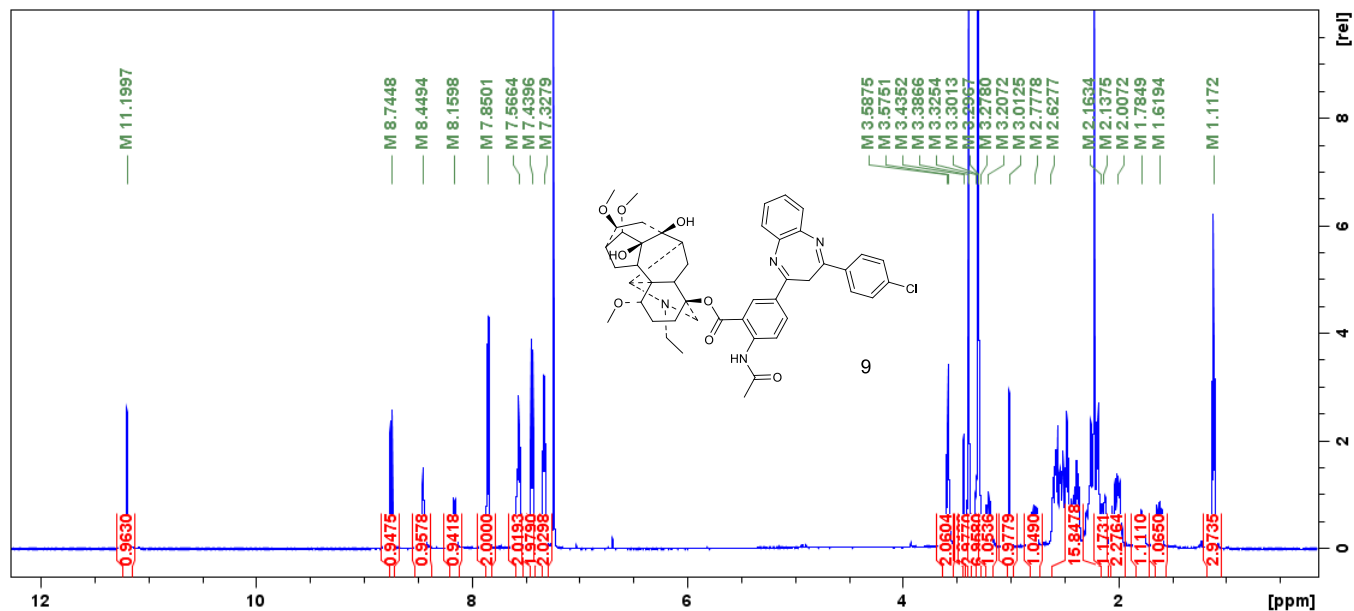

Figure S 4.2.  $^{13}\text{C}$  NMR spectrum for compound **9** ( $\text{CDCl}_3$ , 125 MHz)

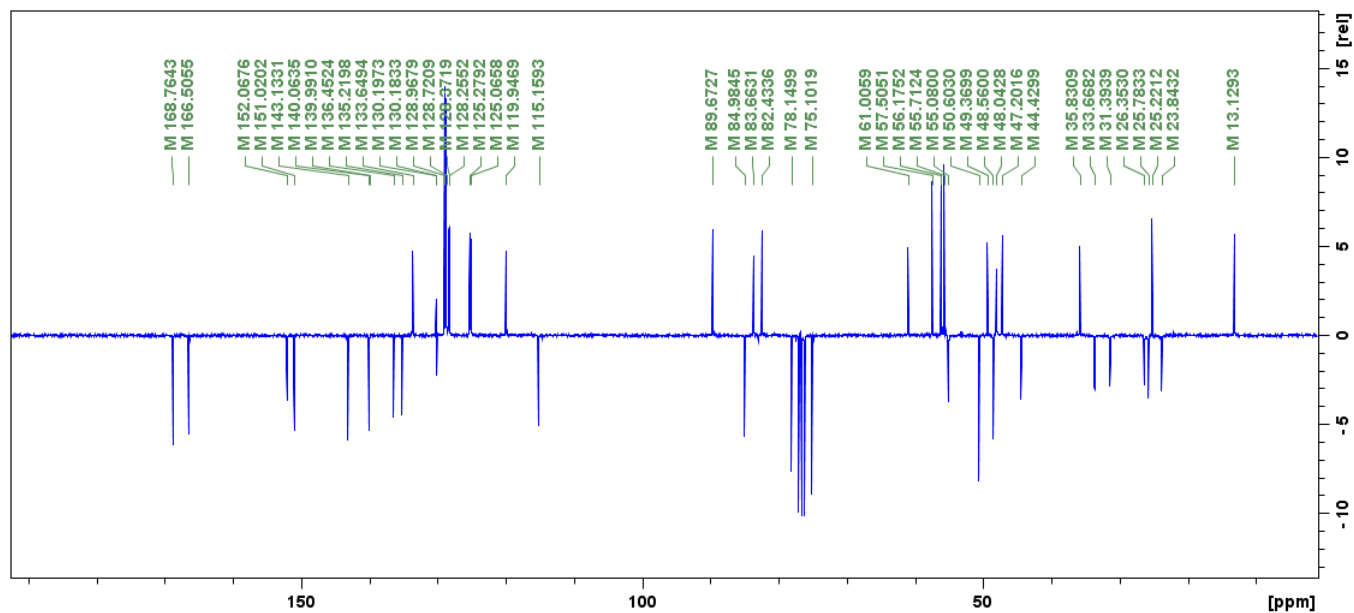

Figure S 5.1.  $^1\text{H}$  NMR spectrum for compound **10** ( $\text{CDCl}_3$ , 500 MHz)

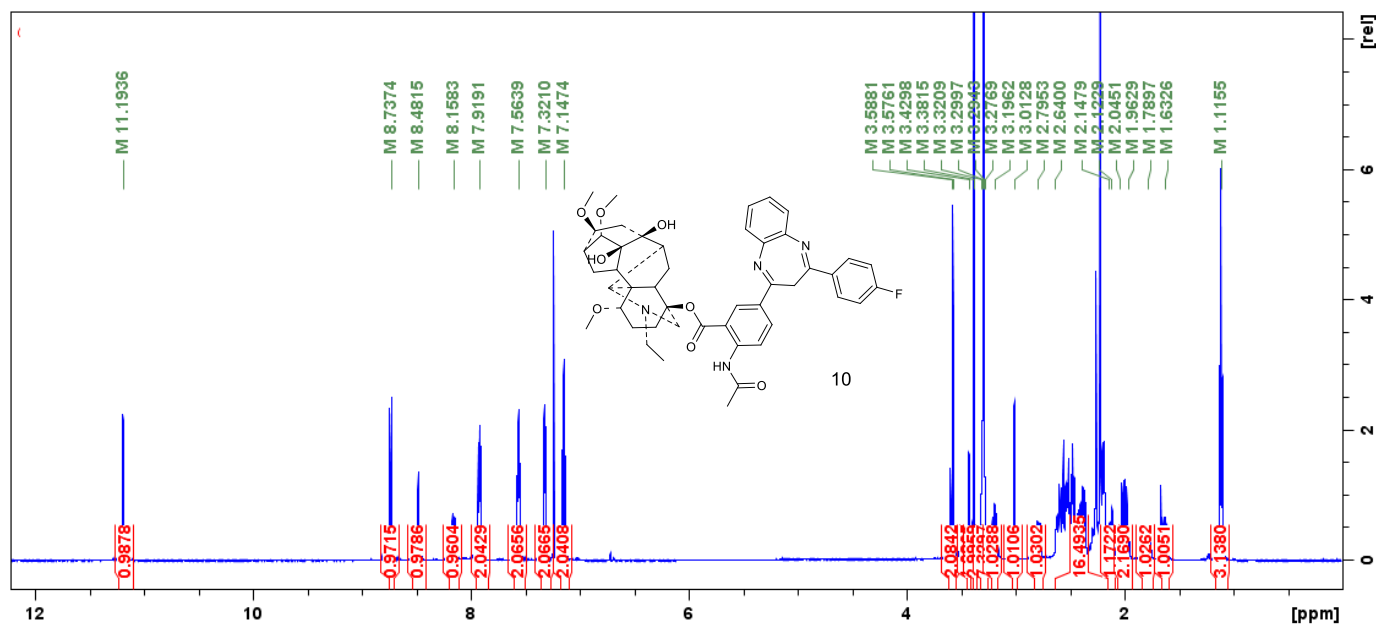

Figure S 5.2.  $^{13}\text{C}$  NMR spectrum for compound **10** ( $\text{CDCl}_3$ , 125 MHz)

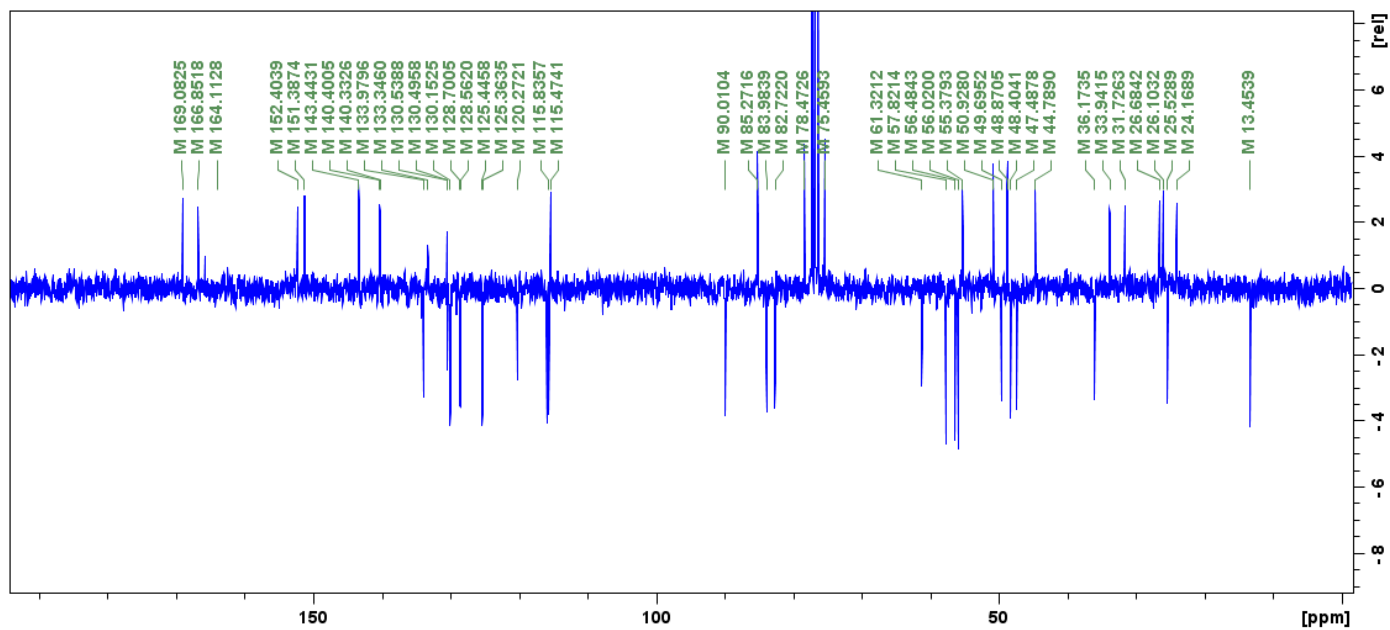



Figure S 6.1.  $^1\text{H}$  NMR spectrum for compound **11** ( $\text{CDCl}_3$ , 400 MHz)

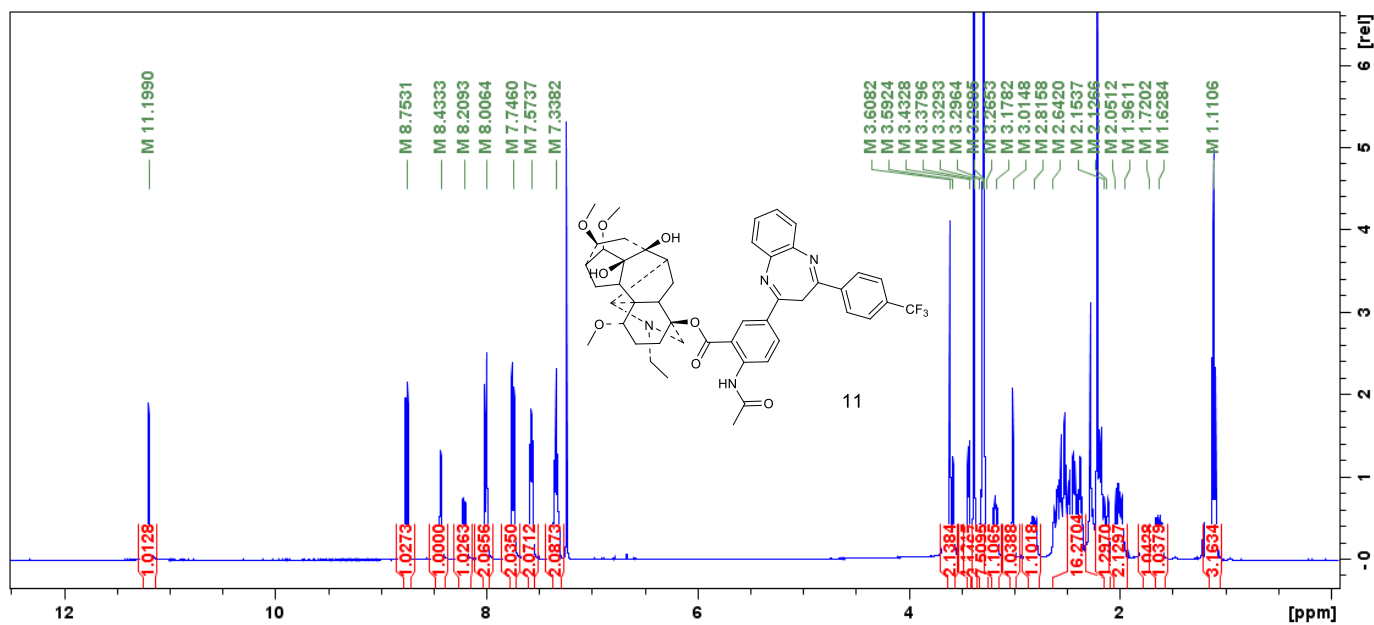

Figure S 6.2.  $^{13}\text{C}$  NMR spectrum for compound **11** ( $\text{CDCl}_3$ , 100 MHz)

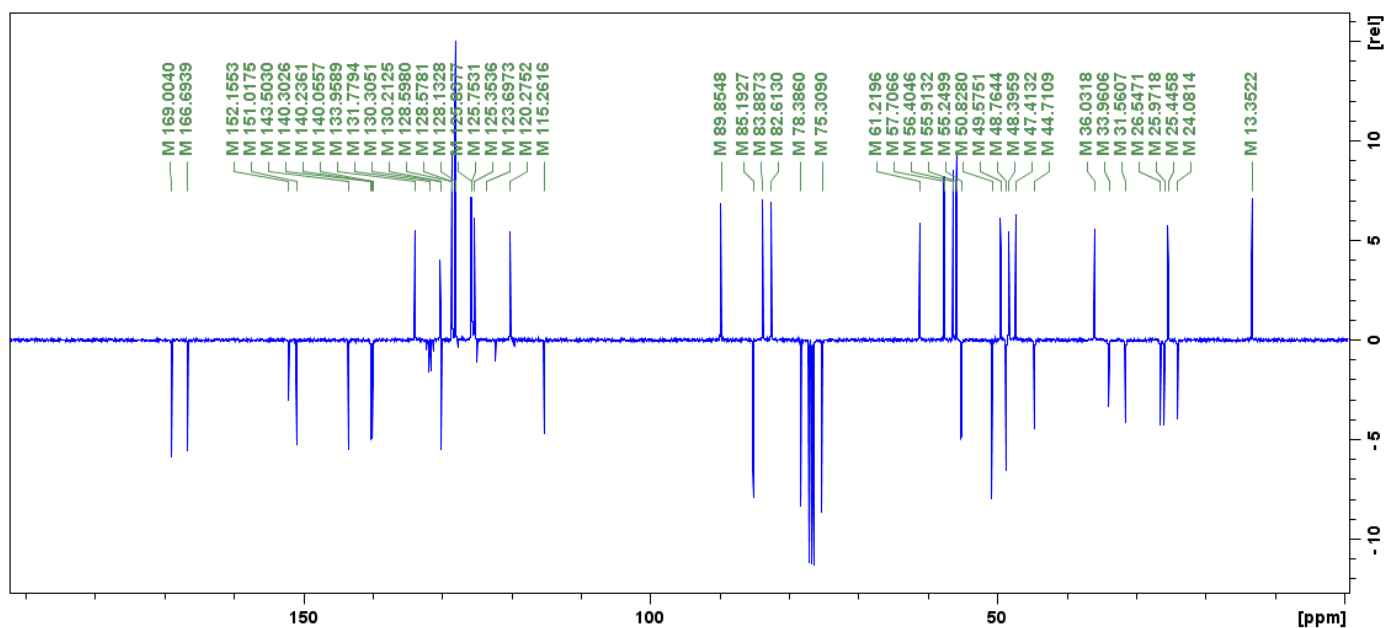

Figure S 7.1.  $^1\text{H}$  NMR spectrum for compound **12** ( $\text{CDCl}_3$ , 400 MHz)

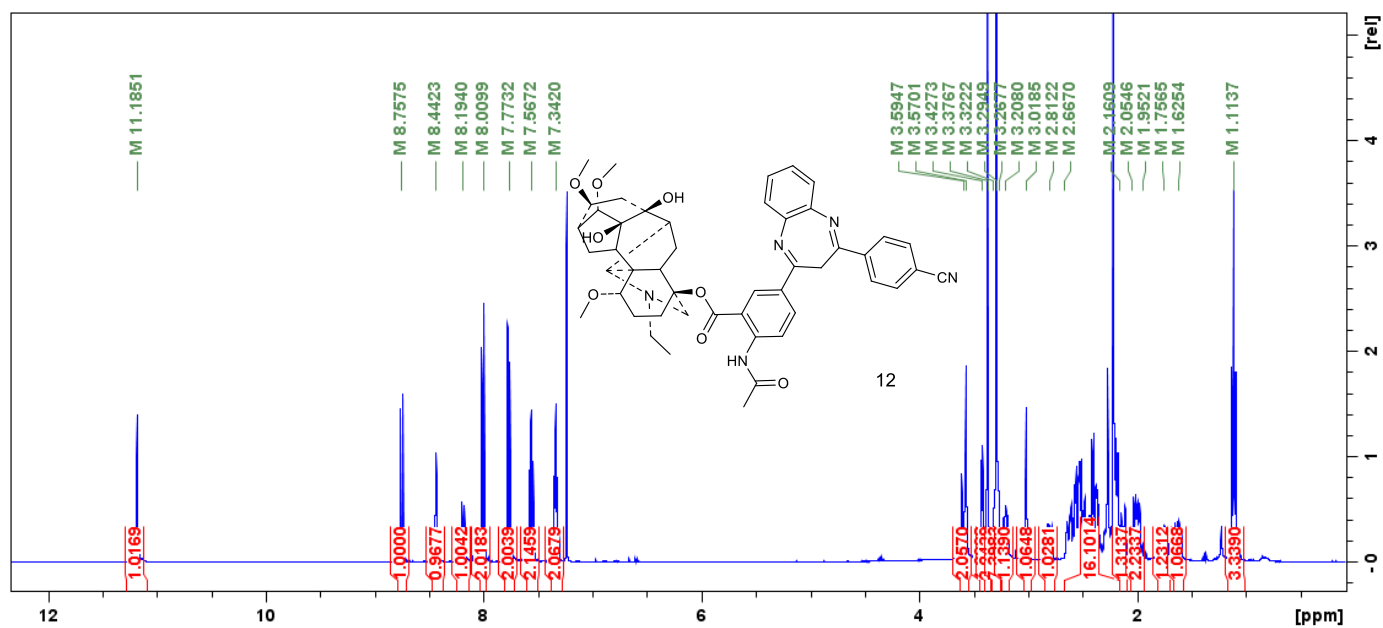

Figure S 7.2.  $^{13}\text{C}$  NMR spectrum for compound **12** ( $\text{CDCl}_3$ , 125 MHz)

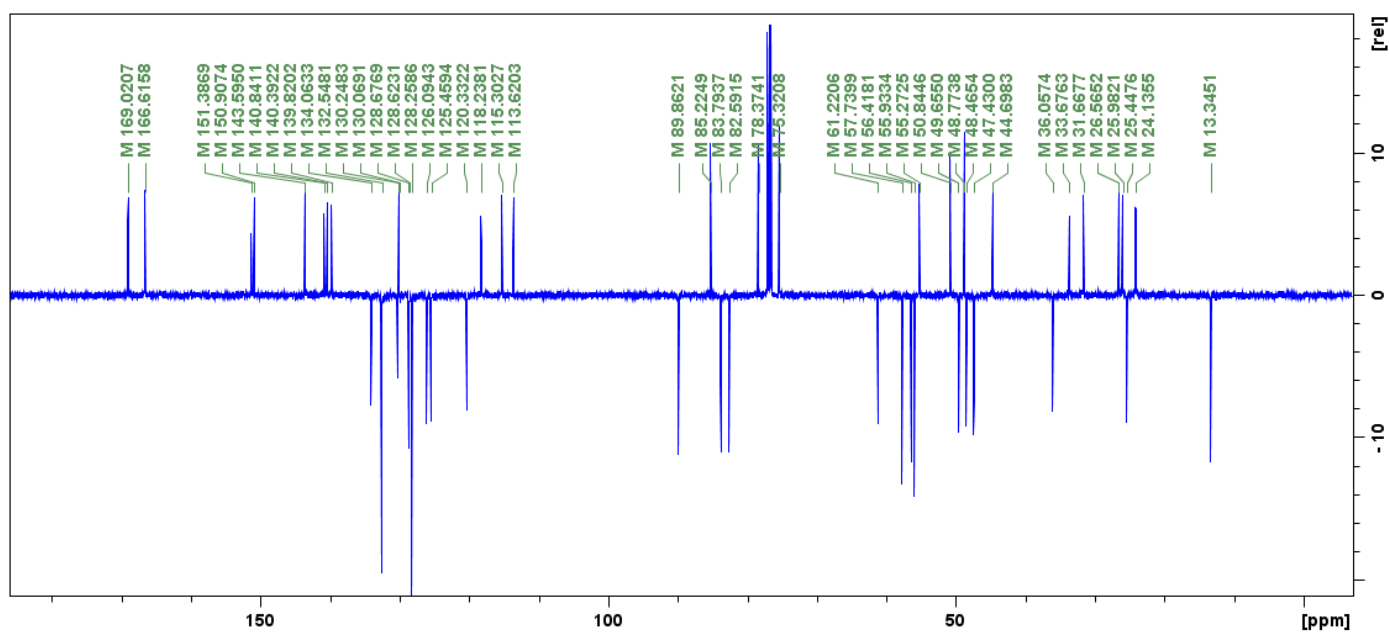

Figure S 8. Effect of compound 8 injection (dose 5mg/kg) on ECG parameters

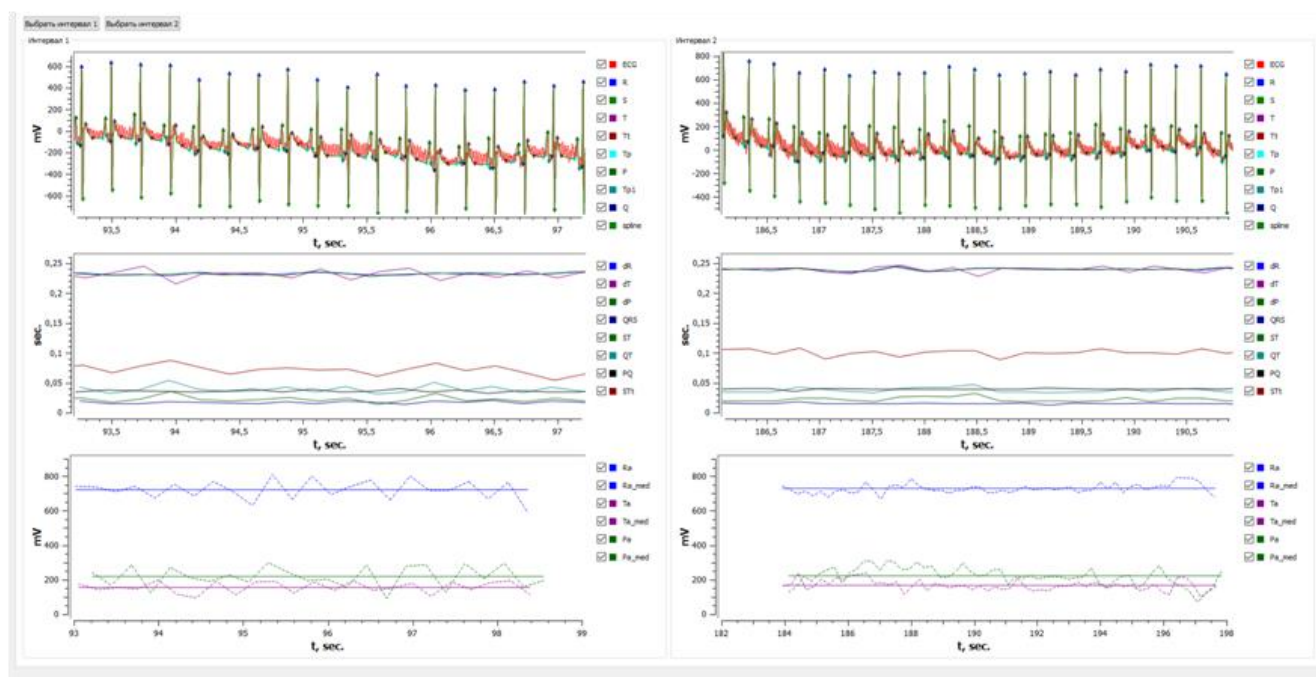

Figure S 9. Effect of compound 10 injection (dose 5mg/kg) on ECG parameters

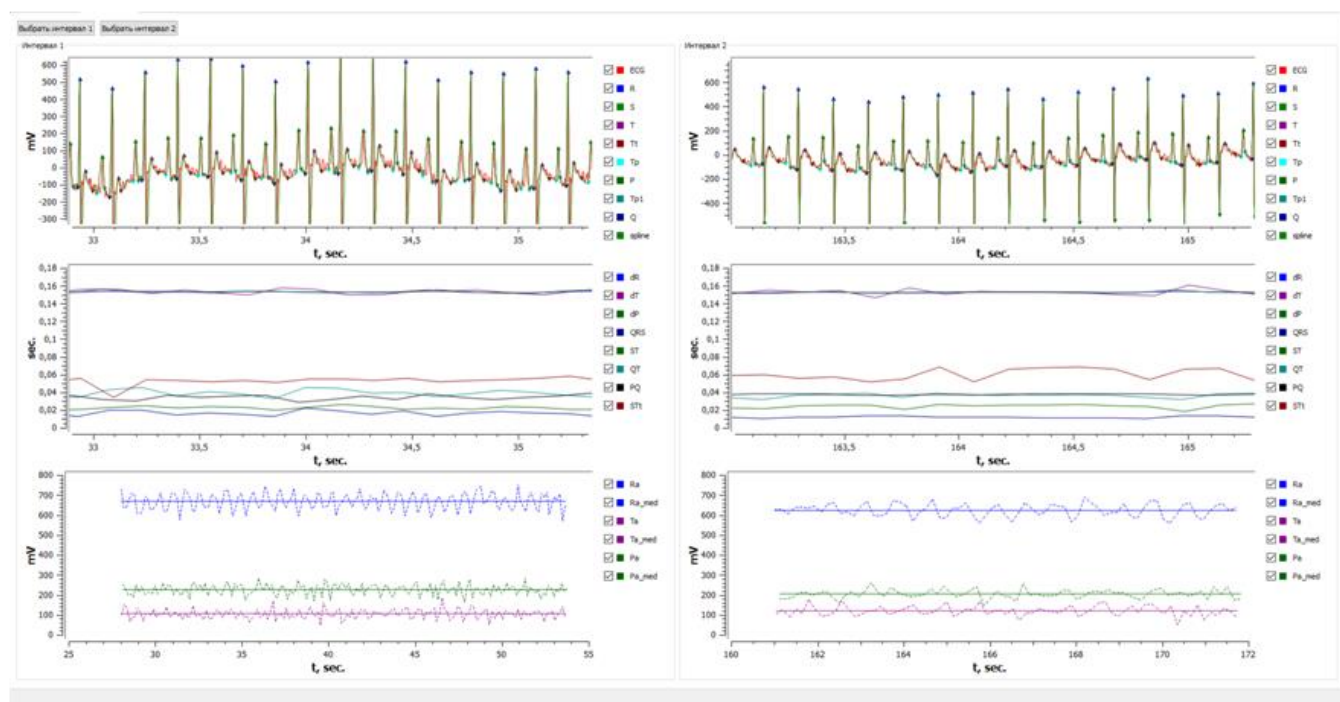

Figure S10. Changes in the rat ECG during administration of compound **8** (10 mg/kg) on a model of calcium chloride arrhythmia.

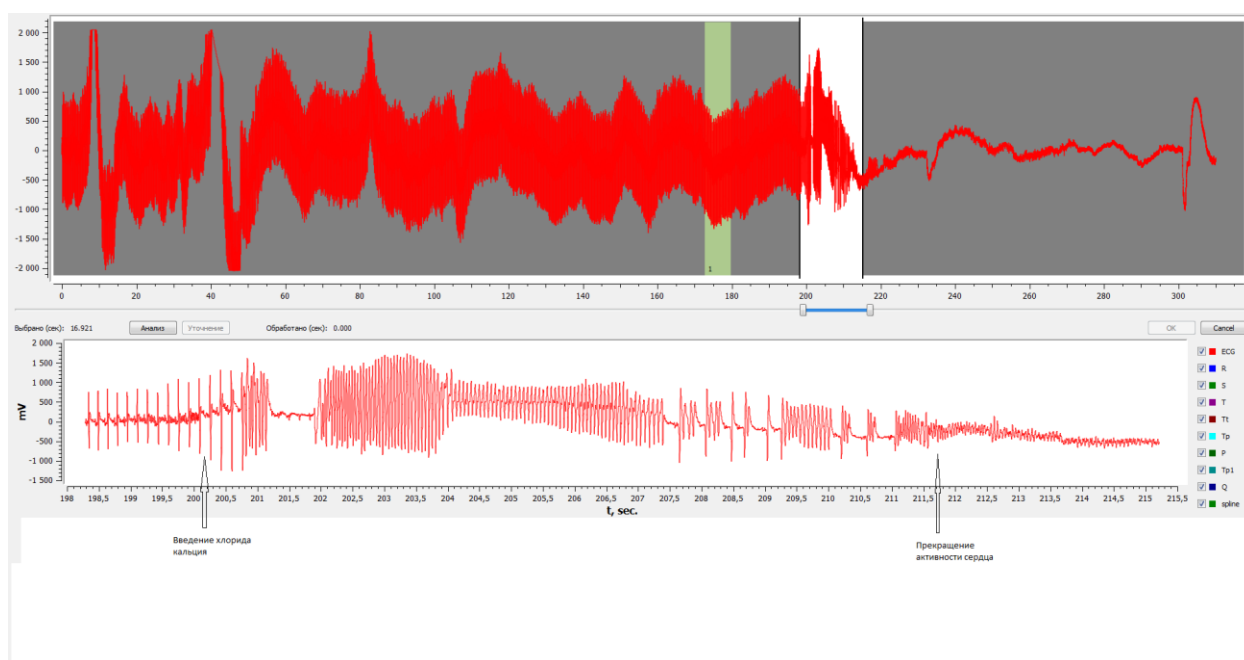

Figure S11. Arrhythmia in rats caused by the introduction of epinephrine and restoration of the rhythm against the background of the administered compound **8** (5 mg/kg). A) native ECG, B) tachycardia after epinephrine administration, C) ECG recovery.

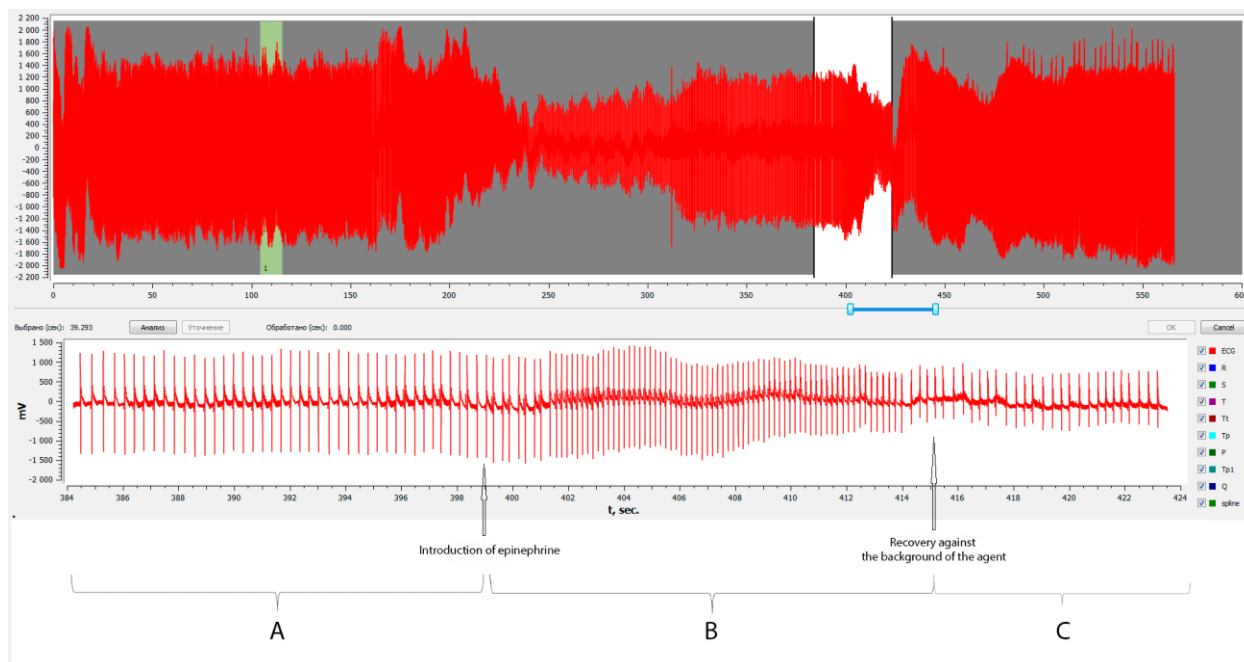

Figure S12. Rat atrium bead alteration after administration of: (1) Epinephrine (2) barium chloride or (3) calcium chloride at the concentration of  $10^{-3}$  M. The peak - injection of the arrhythmogen.

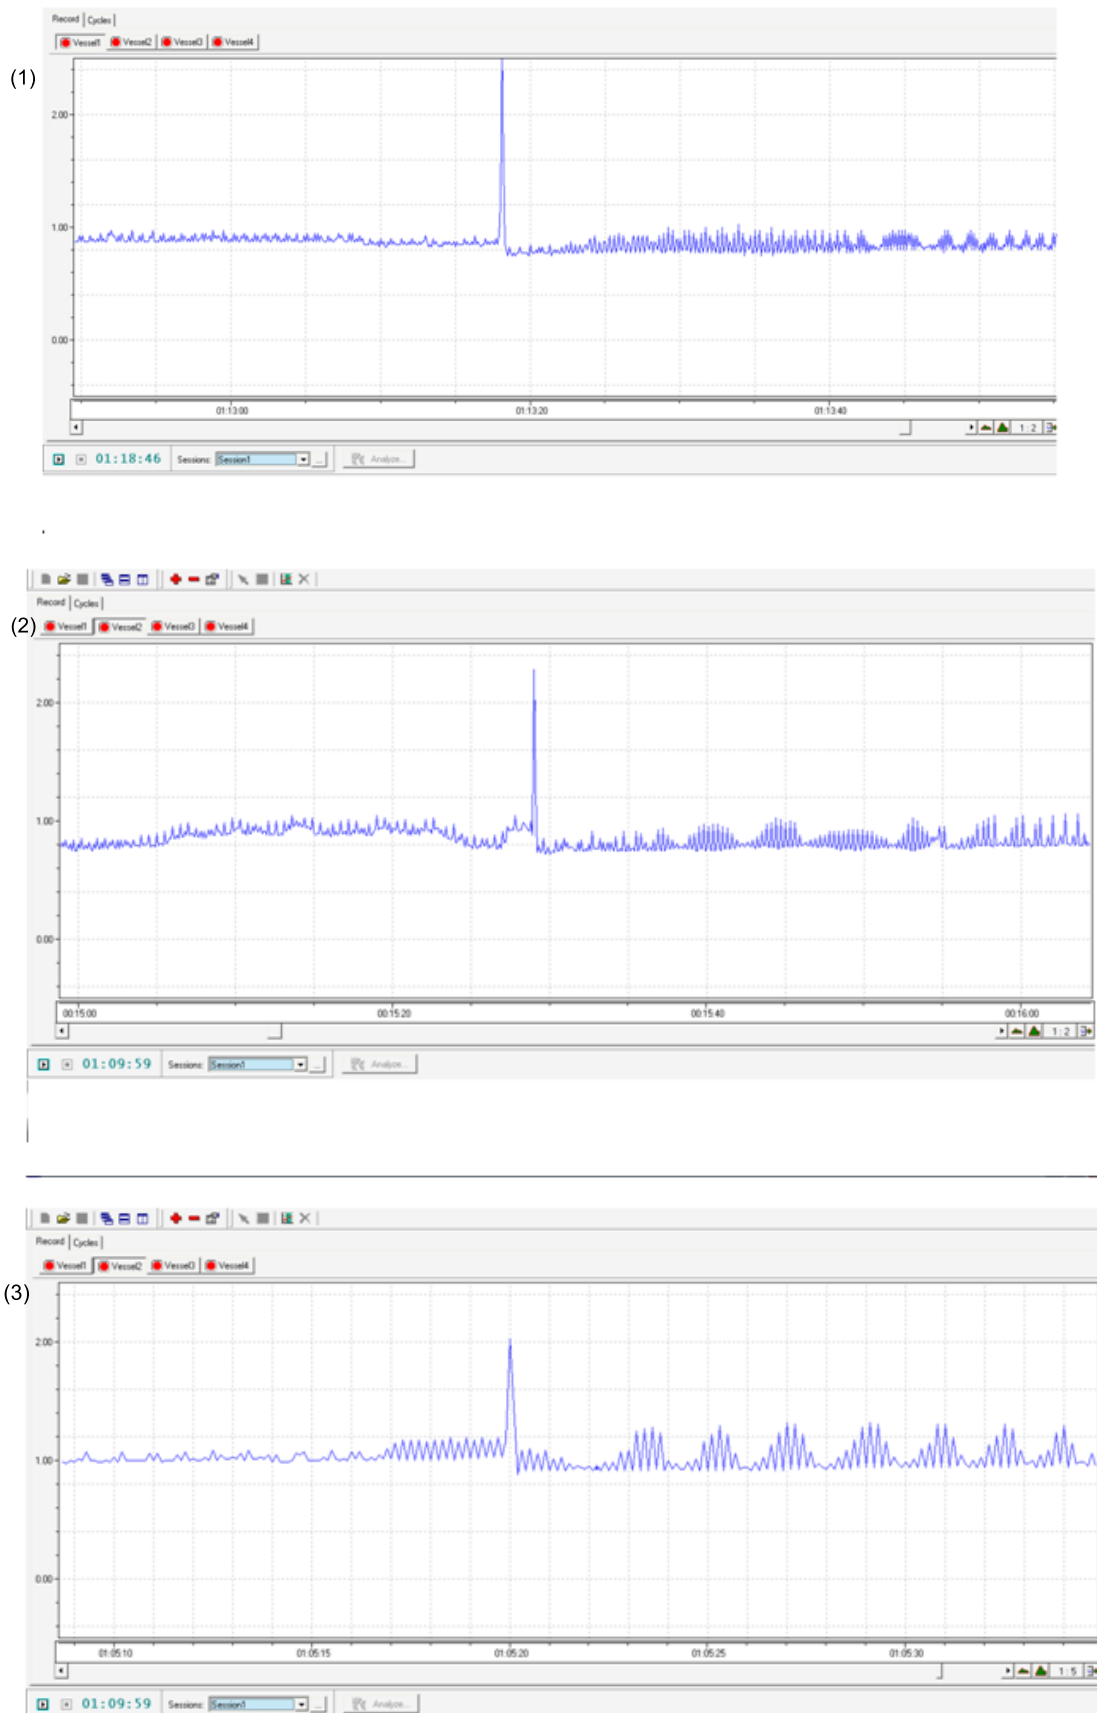

Figure S13. Rat atrium bead alteration after administration of: (1) epinephrine (2) barium chloride or (3) calcium chloride (concentration of  $10^{-3}$  M) against the background of compounds **8** or **10** ( the peak - injection of the arrhythmogen.

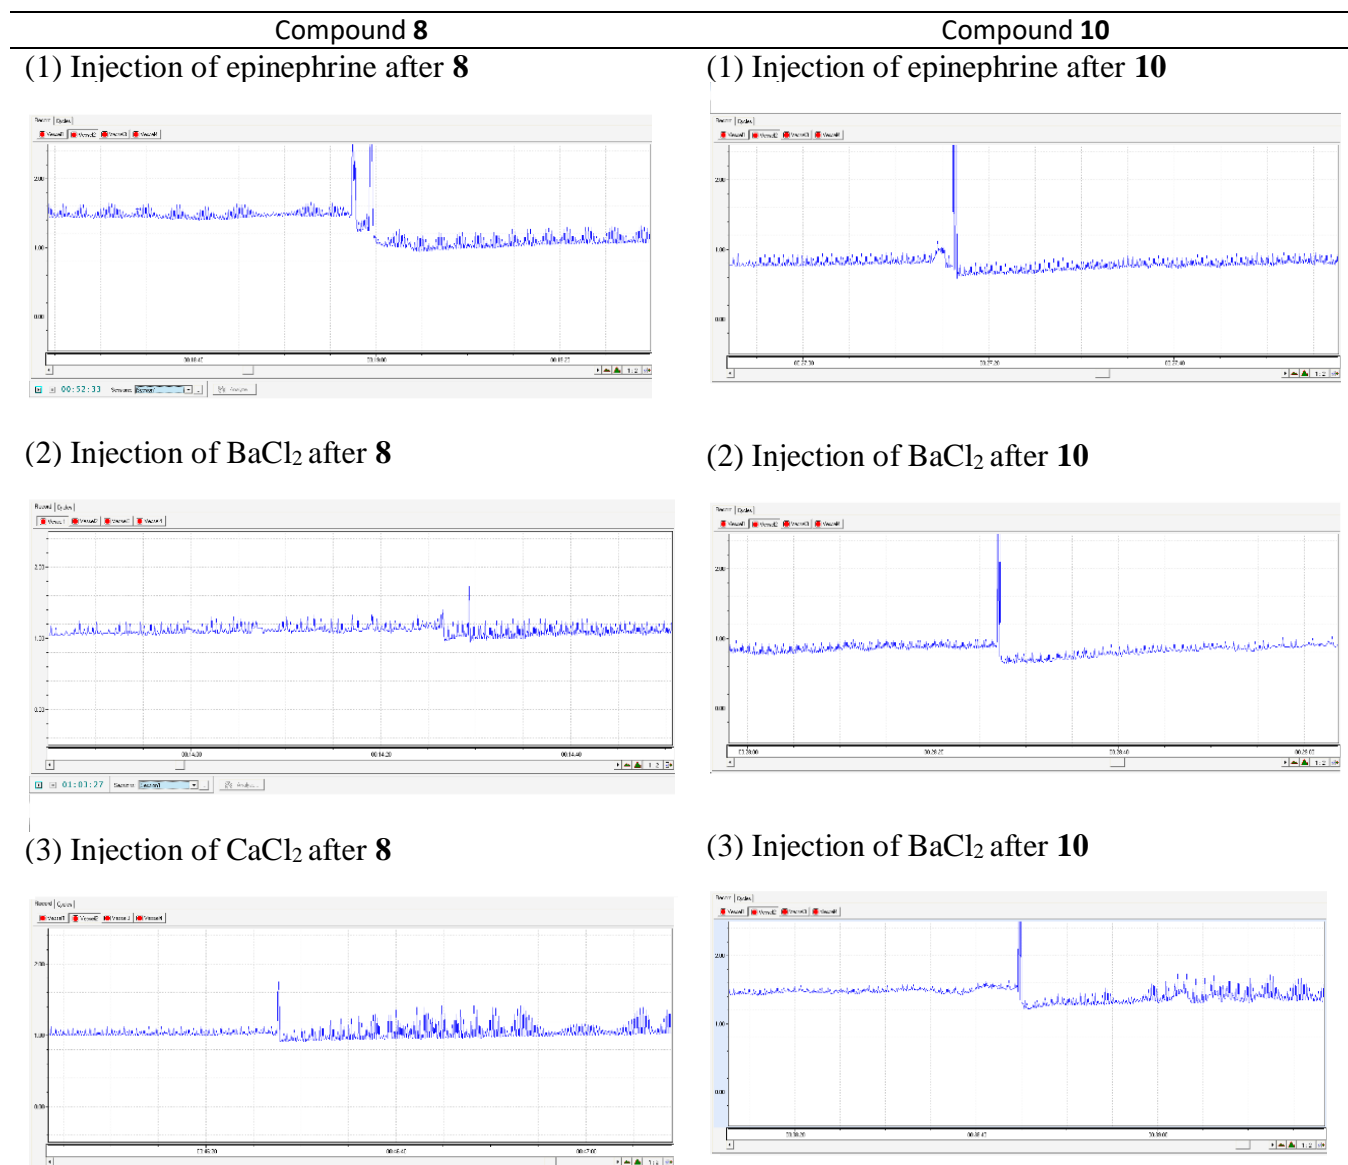

**Table S1.** Influence of compounds **8** and **10** on ECG parameters in rats in dose 5mg/kg ( $\pm$  shows the spread of the standard error from the mean data).

| ECG parameters | dR                 | dT                | dP                | QRS                | ST                | QT                 | Ra                 | Ta                  | Pa                 |
|----------------|--------------------|-------------------|-------------------|--------------------|-------------------|--------------------|--------------------|---------------------|--------------------|
| Starting ECG   | 0.152 $\pm$ 0.005  | 0.152 $\pm$ 0.007 | 0.152 $\pm$ 0.013 | 0.016 $\pm$ 0.001  | 0.022 $\pm$ 0.002 | 0.038 $\pm$ 0.001  | 667.39 $\pm$ 15.08 | 104.59 $\pm$ 5.78   | 226.01 $\pm$ 11.64 |
| With <b>8</b>  | 0.153 $\pm$ 0.002  | 0.153 $\pm$ 0.009 | 0.153 $\pm$ 0.008 | 0.012 $\pm$ 0.001  | 0.023 $\pm$ 0.001 | 0.035 $\pm$ 0.007  | 624.49 $\pm$ 20.8  | 119.53 $\pm$ 6.3    | 204.91 $\pm$ 6.5   |
| Starting ECG   | 0.232 $\pm$ 0.0008 | 0.231 $\pm$ 0.052 | 0.232 $\pm$ 0.012 | 0.017 $\pm$ 0.0008 | 0.022 $\pm$ 0.001 | 0.039 $\pm$ 0.001  | 721.04 $\pm$ 30.2  | 156.62 $\pm$ 9.8    | 218.12 $\pm$ 15.15 |
| With <b>10</b> | 0.24 $\pm$ 0.0012  | 0.24 $\pm$ 0.03   | 0.24 $\pm$ 0.009  | 0.015 $\pm$ 0.001  | 0.022 $\pm$ 0.001 | 0.037 $\pm$ 0.0001 | 726.82 $\pm$ 28.8  | 168.37 $\pm$ 15.128 | 221.86 $\pm$ 12.8  |

**Table S2.** Statistical differences in the amplitude and frequency of contraction of the rat right atrium against the background of compounds **8,10** and arrhythmogenes.

| Compound         | Concentration, M | Amplitude, mV      |                   | Frequency, Hz   |                  |
|------------------|------------------|--------------------|-------------------|-----------------|------------------|
|                  |                  | Before             | After             | Before          | After            |
| <b>8</b>         | 10 <sup>-3</sup> | 0.156 $\pm$ 0.018  | 0.158 $\pm$ 0.004 | 0.22 $\pm$ 0.04 | 0.20 $\pm$ 0.001 |
| <b>10</b>        | 10 <sup>-3</sup> | 0.18 $\pm$ 0.015   | 0.20 $\pm$ 0.009* | 0.33 $\pm$ 0.05 | 0.29 $\pm$ 0.1   |
| Epinephrine      | 10 <sup>-3</sup> | 0.14 $\pm$ 0.023** | 0.24 $\pm$ 0.045  | 2.2             | 3.4              |
| Barium chloride  | 10 <sup>-3</sup> | 0.10 $\pm$ 0.06**  | 0.22 $\pm$ 0.01   | 2.6             | 3.4              |
| Calcium chloride | 10 <sup>-3</sup> | 0.18 $\pm$ 0.01**  | 0.34 $\pm$ 0.01** | 2.6             | 3.2              |

\*P < 0.05. \*\*P<0.01 before vs. after

**Table S3.** Statistical differences in the amplitude and frequency of contraction of the rat right atrium after the introduction of arrhythmogen against the background of compounds **8, 10**.

| Compound  | Epinephrine 10 <sup>-3</sup> M |                 |               |       | Barium chloride 10 <sup>-3</sup> M |                  |               |       | Calcium chloride 10 <sup>-3</sup> M |                 |               |       |
|-----------|--------------------------------|-----------------|---------------|-------|------------------------------------|------------------|---------------|-------|-------------------------------------|-----------------|---------------|-------|
|           | Amplitude, mV                  |                 | Frequency, Hz |       | Amplitude, mV                      |                  | Frequency, Hz |       | Amplitude, mV                       |                 | Frequency, Hz |       |
|           | Before                         | After           | Before        | After | Before                             | After            | Before        | After | Before                              | After           | Before        | After |
| <b>8</b>  | 0.17 $\pm$ 0.01                | 0.18 $\pm$ 0.02 | 2.6           | 2.8   | 0.095 $\pm$ 0.02*                  | 0.128 $\pm$ 0.01 | 2.6           | 1.6   | 0.095 $\pm$ 0.02*                   | 0.24 $\pm$ 0.03 | 2.6           | 3.2   |
| <b>10</b> | 0.18 $\pm$ 0.07                | 0.17 $\pm$ 0.03 | 2.2           | 3.4   | 0.2 $\pm$ 0.018                    | 0.22 $\pm$ 0.04  | 2.2           | 3.4   | 0.38 $\pm$ 0.05*                    | 0.98 $\pm$ 0.01 | 2.2           | 3.2   |

\*P < 0.05





Figure S15. Superposition of sodium channel blockers: green – flecainide **16**, yellow – compound **8**, orange – compound **10**.

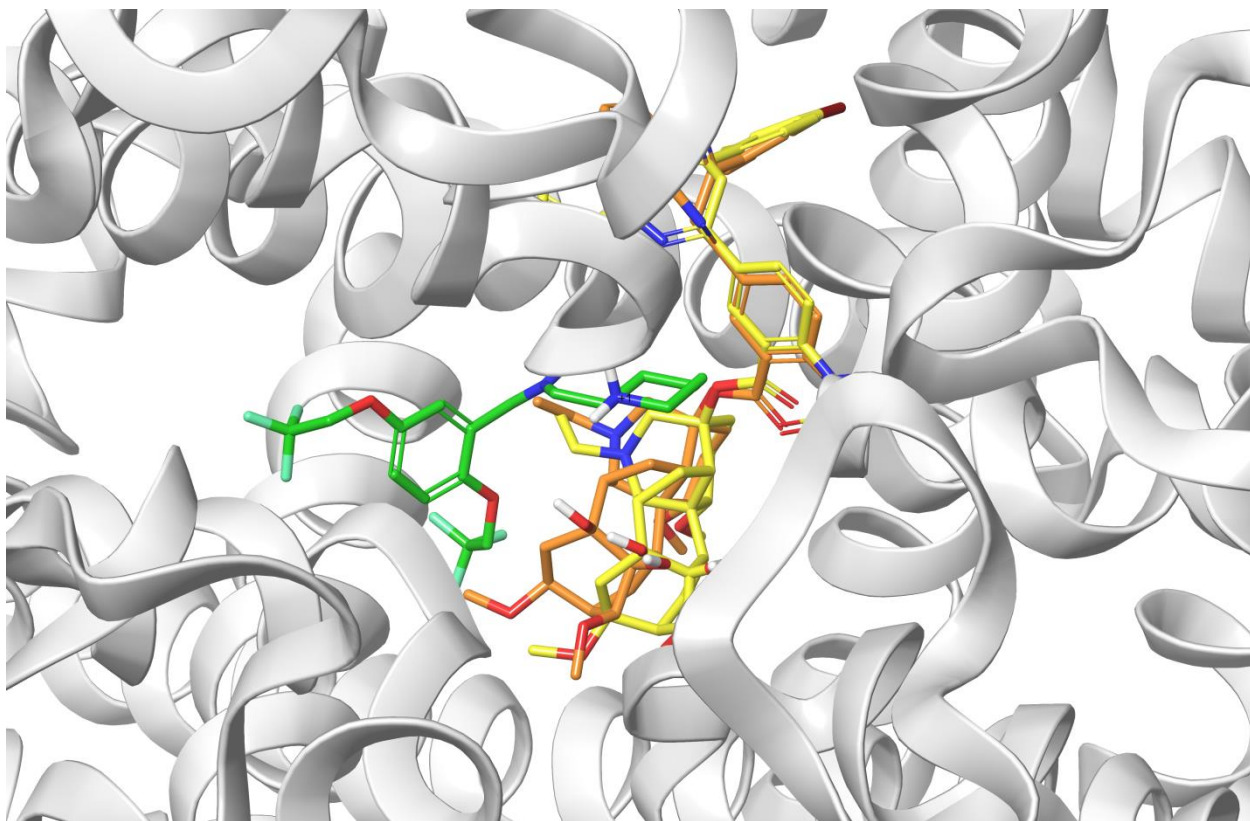

Figure S16. HPLC-UV chromatogram for **4 $\beta$ -{2'-Acetylamino-5'-(4''-(4-bromophenyl)-3H-1,5-benzodiazepine-2''-yl)benzoate}-1 $\alpha$ ,14 $\alpha$ ,16 $\beta$ -trimethoxy-20-ethylaconitane-8,9-diol (8)**

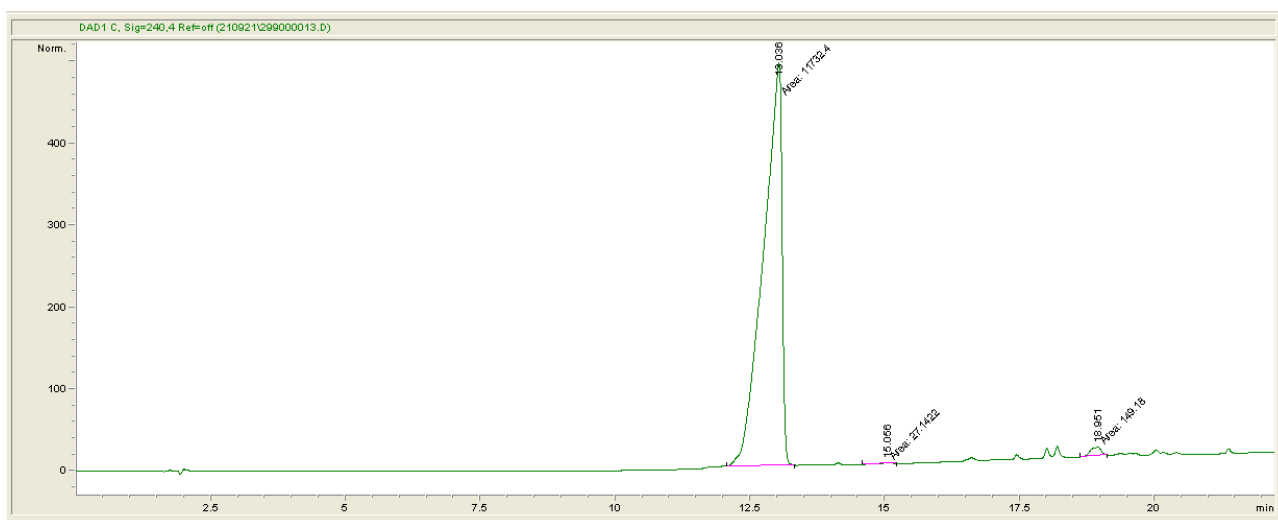

Purity – 98.52%

Retention time - 13,06 мин.

Absorption maximum at wavelength 240 nm.
